# Supplementary material for: Pain anticipation is a new behavioural sign of minimally conscious state
Source: PubMed Central journal article supplement (PMC11430917; doi:10.1093/braincomms/fcae311), 2024-09-16
Supplement: fcae311_supplementary_data.pdf [file fcae311_supplementary_data.pdf]

## Supplementary Materials

| Num | State  | Sex, Age | Etiology   | Delay (d) | Neurotropic med | CRS-r A/V/M/O/C/A | NCS-r M/V/F | ASR | NAR | NTAR | Outcome   |
|-----|--------|----------|------------|-----------|-----------------|-------------------|-------------|-----|-----|------|-----------|
| 1   | VS/UWS | M,71     | anoxia     | 77        | ZNS, VPA, LEV   | 6:1/0/2/1/0/2     | 3:2/0/1     | IN  | no  | no   | MCS       |
| 2   | VS/UWS | F,34     | hypogly    | 38        | LEV             | 4:1/0/1/1/0/1     | 1:1/0/0     | IN  | no  | no   | Death     |
| 3   | VS/UWS | M,66     | PRESS      | 40        | -               | 7:1/1/2/1/0/2     | 3:2/0/1     | IN  | no  | no   | Death     |
| 4   | VS/UWS | M,67     | epilepsy   | 120       | ZNS, VPA Benzo  | 8:2/1/2/1/0/2     | 4:2/0/2     | EX  | yes | no   | Death     |
| 5   | VS/UWS | F,50     | anoxia     | 52        | LEV             | 5:1/0/1/1/0/2     | 3:2/0/1     | IN  | no  | no   | Death     |
| 6   | VS/UWS | F,40     | stroke     | 30        | LEV             | 3:0/0/2/0/0/1     | 2:2/0/0     | abs | no  | no   | Conscious |
| 7   | VS/UWS | M,43     | anoxia     | 73        | Benzo           | 7:1/0/2/2/0/2     | 6:2/2/2     | EX  | no  | no   | VS/UWS    |
| 8   | VS/UWS | F,41     | hypogly    | 13        | -               | 2:0/0/1/0/0/1     | 1:1/0/0     | IN  | no  | no   | Death     |
| 9   | VS/UWS | M,78     | anoxia     | 46        | LEV             | 5:1/0/2/1/0/1     | 3:2/0/1     | EX  | no  | no   | Death     |
| 10  | VS/UWS | M,49     | anoxia     | 24        | LCM,Benzo       | 4:1/0/1/1/0/1     | 1:1/0/0     | IN  | no  | no   | Death     |
| 11  | VS/UWS | F,29     | dys.enc    | 97        | LCM             | 6:1/0/2/1/0/2     | 4:2/0/2     | IN  | no  | no   | Conscious |
| 12  | VS/UWS | F,61     | anoxia     | 17        | Morphine        | 6:1/1/2/1/0/1     | 2:1/0/1     | IN  | no  | no   | Death     |
| 13  | VS/UWS | M,60     | stroke     | 48        | LEV, LCM,       | 6:1/1/2/1/0/1     | 4:2/0/2     | EX  | no  | no   | Death     |
| 14  | VS/UWS | M,56     | anoxia     | 62        | SCP             | 6:1/0/2/1/0/2     | 1:1/0/0     | IN  | no  | no   | Conscious |
| 15  | VS/UWS | M,57     | stroke     | 15        | LEV             | 6:1/1/2/1/0/1     | 3:2/0/1     | EX  | no  | no   | Conscious |
| 16  | VS/UWS | M,21     | anoxia     | 44        | Morphine        | 7:1/1/2/1/0/2     | 2:2/0/0     | EX  | no  | no   | Death     |
| 17  | VS/UWS | F,47     | stroke     | 707       | LEV             | 5:1/0/2/1/0/1     | 3:2/0/1     | EX  | no  | no   | VS/UWS    |
| 18  | VS/UWS | M,53     | stroke     | 26        | VPA             | 7:1/1/2/1/0/2     | 3:2/0/1     | EX  | no  | no   | Death     |
| 19  | VS/UWS | M,49     | anoxia     | 22        | LEV             | 6:0/1/2/1/0/2     | 2:2/0/0     | IN  | no  | no   | Death     |
| 20  | VS/UWS | F,64     | anoxia     | 23        | LEV             | 3:0/0/1/1/0/1     | 1:1/0/0     | abs | no  | no   | Death     |
| 21  | VS/UWS | M,37     | anoxia     | 372       | LEV, Xenazine   | 6:1/0/2/1/0/2     | 4:2/0/2     | EX  | no  | no   | Death     |
| 22  | VS/UWS | M,55     | hypogly    | 56        | SCP             | 6:1/0/2/1/0/2     | 3:2/0/1     | IN  | no  | no   | Death     |
| 23  | VS/UWS | M,28     | TBI        | 43        | Morphine        | 5:1/0/1/1/0/2     | 1:1/0/0     | IN  | no  | no   | Death     |
| 24  | VS/UWS | F,58     | stroke     | 51        | LEV             | 3:0/1/1/1/0/0     | 1:1/0/1     | abs | no  | no   | VS/UWS    |
| 25  | MCS-   | F,41     | anoxia     | 5852      | LEV             | 10:1/0/5/2/0/2    | 3:2/0/1     | abs | no  | no   | MCS       |
| 26  | MCS-   | F,31     | anoxia     | 27        | ZNS,LEV         | 10:2/3/2/1/0/2    | 6:3/1/2     | EX  | yes | yes  | Conscious |
| 27  | MCS-   | F,59     | anoxia     | 13        | -               | 14:2/3/5/2/0/2    | 4:2/0/3     | EX  | yes | yes  | Conscious |
| 28  | MCS-   | M,21     | stroke     | 299       | Morphine        | 9:2/3/2/1/0/1     | 5:2/0/3     | IN  | no  | no   | Death     |
| 29  | MCS-   | M,68     | stroke     | 25        | -               | 11:2/2/5/1/0/1    | 5:3/0/2     | EX  | yes | yes  | Conscious |
| 30  | MCS-   | F,53     | infectious | 68        | LEV             | 14:2/3/5/2/0/2    | 8:3/2/3     | EX  | yes | yes  | Conscious |
| 31  | MCS-   | F,48     | dys.enc    | 11        | ESC             | 9:1/1/5/1/0/1     | 6:3/1/2     | IN  | no  | no   | Conscious |
| 32  | MCS-   | M,63     | stroke     | 28        | -               | 10:2/3/2/1/0/2    | 4:2/0/2     | EX  | no  | no   | Conscious |
| 33  | MCS-   | F,45     | dys.enc    | 79        | -               | 11:2/3/2/2/0/2    | 5:2/1/2     | EX  | yes | yes  | Conscious |
| 34  | MCS-   | F,61     | anoxia     | 33        | -               | 13:2/3/5/1/0/2    | 4:2/0/2     | EX  | no  | no   | MCS       |
| 35  | MCS-   | F,51     | anoxia     | 12        | LEV             | 11:2/3/3/1/0/2    | 6:3/1/2     | EX  | yes | no   | Death     |
| 36  | MCS-   | M,21     | TBI        | 124       | LEV,Benzo       | 8:1/3/1/1/0/2     | 2:1/0/1     | IN  | no  | no   | Death     |
| 37  | MCS-   | F,25     | TBI        | 544       | LTG             | 12:2/3/4/1/0/2    | 5:3/0/2     | EX  | yes | yes  | MCS       |
| 38  | MCS-   | M,34     | TBI        | 245       | SCP             | 9:1/1/4/1/0/2     | 5:3/0/2     | EX  | yes | yes  | MCS       |
| 39  | MCS-   | F,36     | infectious | 76        | -               | 9:2/2/2/1/0/2     | 4:2/0/2     | EX  | no  | no   | MCS       |
| 40  | MCS-   | M,33     | TBI        | 120       | GBP,Benzo       | 10:2/3/2/1/0/2    | 4:2/0/2     | EX  | no  | no   | Conscious |
| 41  | MCS-   | M,55     | anoxia     | 17        | -               | 7:1/0/5/1/0/0     | 4:2/0/2     | EX  | no  | no   | Conscious |
| 42  | MCS+   | M,56     | infectious | 56        | Benzo           | 19:3/5/5/2/1/3    | 6:3/1/2     | EX  | yes | yes  | Conscious |
| 43  | MCS+   | M,61     | infectious | 51        | -               | 11:3/3/2/1/0/2    | 5:2/1/2     | EX  | yes | yes  | Conscious |
| 44  | MCS+   | M,50     | infectious | 46        | -               | 14:3/3/5/1/0/2    | 5:3/0/2     | EX  | no  | no   | Conscious |
| 45  | MCS+   | F,54     | anoxia     | 42        | ZNG             | 12:3/3/3/1/0/2    | 5:3/0/2     | IN  | yes | yes  | Death     |
| 46  | MCS+   | F,73     | infectious | 140       | SCP, Morphine   | 14:3/3/4/1/0/3    | 8:3/3/2     | EX  | yes | yes  | Death     |
| 47  | MCS+   | M,19     | anoxia     | 156       | Benzo           | 16:4/3/4/2/0/3    | 7:3/2/2     | EX  | yes | yes  | Death     |
| 48  | MCS+   | M,59     | TBI        | 219       | Benzo,AML       | 13:3/4/2/2/0/2    | 4:2/0/2     | EX  | yes | yes  | Death     |
| 49  | MCS+   | F,59     | anoxia     | 23        | Benzo           | 12:4/3/2/1/0/2    | 5:2/1/2     | EX  | yes | yes  | Conscious |
| 50  | MCS+   | M,52     | anoxia     | 37        | LEV,ZNG,Benzo   | 15:3/5/2/1/1/3    | 4:2/0/2     | EX  | yes | yes  | Death     |
| 51  | MCS+   | F,71     | infectious | 97        | LEV,LCM,Benzo   | 19:3/5/5/2/1/3    | 6:2/2/2     | EX  | yes | yes  | Death     |
| 52  | MCS+   | M,56     | TBI        | 478       | AML             | 15:3/4/5/1/0/2    | 5:3/0/2     | EX  | yes | yes  | Conscious |
| 53  | EMCS   | M,18     | TBI        | 124       | LCM,Benzo       | 22:4/5/6/2/2/3    | 7:3/2/2     | EX  | yes | yes  | Conscious |
| 54  | EMCS   | M,34     | TBI        | 109       | AML             | 23:4/5/6/3/2/3    | 7:3/2/2     | EX  | yes | yes  | Conscious |
| 55  | EMCS   | M,28     | epilepsy   | 106       | LTG,VPA         | 19:4/5/5/1/1/3    | 7:3/2/2     | IN  | yes | yes  | Conscious |
| 56  | EMCS   | M,80     | TBI        | 88        | -               | 19:3/4/6/2/1/3    | 8:3/3/2     | EX  | yes | yes  | Death     |
| 57  | EMCS   | M,63     | stroke     | 64        | CPZ             | 19:3/4/6/2/1/3    | 8:3/3/2     | EX  | yes | yes  | Conscious |

**Supplementary Table 1. Patient characteristics** Sex, Age, Aetiology, Delay of DoC in days, Sedative or neurotropic medications, CRS-r (A:Auditory, V: Visual, M: Motor,O: Oromotor, A: Arousal, C: Communication subscales) , NCS-r (M: Motor, V:Verbal, F:Facial subscales); auditory startle reflexe (IN : inextinguishable, EX ; extinguishable, abs : absent), NTAR ,NAR and 6 months outcome. Abbreviations: epilepsy = Epileptic encephalopathy, dys.enc.=Dysimmune PRESS= posterior reversible encephalopathy syndrome, TBI: Traumatic brain injury. Encephalitis, infectious= infectious encephalitis, Hypogly=Hypoglycemia, AML= Mantadix, Benzo= benzodiazepine, ESC= escitalopram, GBP= Gabapentine, LCM = Lacosamide, LEV=Keppra, LTG= Lamotrigine, SCP= Scopolamine, ZNS=Zonergan, VPA =Depakine

| Num | State  | NAR | NTAR | Local effect | Global effect | CNV | Outcome   |
|-----|--------|-----|------|--------------|---------------|-----|-----------|
| 1   | VS/UWS | no  | no   | No           | no            | no  | MCS       |
| 2   | VS/UWS | no  | no   | no           | no            | no  | Death     |
| 3   | VS/UWS | no  | no   | yes          | no            | no  | Death     |
| 4   | VS/UWS | yes | no   | yes          | yes           | no  | Death     |
| 5   | VS/UWS | no  | no   | no           | no            | no  | Death     |
| 6   | VS/UWS | no  | no   | no           | yes           | yes | Conscious |
| 7   | VS/UWS | no  | no   | no           | no            | no  | VS/UWS    |
| 8   | VS/UWS | no  | no   | -            | -             | -   | Death     |
| 9   | VS/UWS | no  | no   | yes          | no            | no  | Death     |
| 10  | VS/UWS | no  | no   | no           | no            | no  | Death     |
| 11  | VS/UWS | no  | no   | no           | no            | no  | Conscious |
| 12  | VS/UWS | no  | no   | no           | no            | no  | Death     |
| 13  | VS/UWS | no  | no   | yes          | no            | yes | Death     |
| 14  | VS/UWS | no  | no   | yes          | no            | no  | Conscious |
| 15  | VS/UWS | no  | no   | no           | no            | no  | Conscious |
| 16  | VS/UWS | no  | no   | no           | no            | yes | Death     |
| 17  | VS/UWS | no  | no   | yes          | yes           | no  | VS/UWS    |
| 18  | VS/UWS | no  | no   | yes          | yes           | yes | Death     |
| 19  | VS/UWS | no  | no   | yes          | yes           | no  | Death     |
| 20  | VS/UWS | no  | no   | yes          | no            | no  | Death     |
| 21  | VS/UWS | no  | no   | no           | no            | no  | Death     |
| 22  | VS/UWS | no  | no   | no           | no            | yes | Death     |
| 23  | VS/UWS | no  | no   | yes          | no            | yes | Death     |
| 24  | VS/UWS | no  | no   | yes          | no            | no  | VS/UWS    |
| 25  | MCS-   | no  | no   | yes          | no            | no  | MCS       |
| 26  | MCS-   | yes | yes  | yes          | yes           | no  | Conscious |
| 27  | MCS-   | yes | yes  | yes          | no            | yes | Conscious |
| 28  | MCS-   | no  | no   | no           | no            | no  | Death     |
| 29  | MCS-   | yes | yes  | yes          | no            | yes | Conscious |
| 30  | MCS-   | yes | yes  | yes          | no            | no  | Conscious |
| 31  | MCS-   | no  | no   | yes          | no            | no  | Conscious |
| 32  | MCS-   | no  | no   | yes          | no            | yes | Conscious |
| 33  | MCS-   | yes | yes  | yes          | no            | yes | Conscious |
| 34  | MCS-   | no  | no   | no           | no            | yes | MCS       |
| 35  | MCS-   | yes | no   | yes          | no            | no  | Death     |
| 36  | MCS-   | no  | no   | yes          | yes           | no  | Death     |
| 37  | MCS-   | yes | yes  | yes          | no            | no  | MCS       |
| 38  | MCS-   | yes | yes  | yes          | yes           | yes | MCS       |
| 39  | MCS-   | no  | no   | yes          | no            | no  | MCS       |
| 40  | MCS-   | no  | no   | yes          | yes           | yes | Conscious |
| 41  | MCS-   | no  | no   | no           | no            | no  | Conscious |
| 42  | MCS+   | yes | yes  | no           | no            | no  | Conscious |
| 43  | MCS+   | yes | yes  | no           | no            | no  | Conscious |
| 44  | MCS+   | no  | no   | no           | no            | no  | Conscious |
| 45  | MCS+   | yes | yes  | yes          | no            | no  | Death     |
| 46  | MCS+   | yes | yes  | no           | no            | yes | Death     |
| 47  | MCS+   | yes | yes  | yes          | no            | yes | Death     |
| 48  | MCS+   | yes | yes  | no           | no            | yes | Death     |
| 49  | MCS+   | yes | yes  | yes          | no            | no  | Conscious |
| 50  | MCS+   | yes | yes  | yes          | no            | yes | Death     |
| 51  | MCS+   | yes | yes  | yes          | yes           | no  | Death     |
| 52  | MCS+   | yes | yes  | no           | no            | yes | Conscious |
| 53  | EMCS   | yes | yes  | yes          | yes           | yes | Conscious |
| 54  | EMCS   | yes | yes  | yes          | yes           | yes | Conscious |
| 55  | EMCS   | yes | yes  | yes          | no            | yes | Conscious |
| 56  | EMCS   | yes | yes  | yes          | no            | yes | Death     |
| 57  | EMCS   | yes | yes  | -            | -             | -   | Conscious |

**Supplementary Table 2. NAR, ERP signatures of the ‘local-global’ auditory paradigm and 6 months outcome.**
